# Supplementary material for: A multiscale screening strategy for the identification of novel xanthine oxidase inhibitors based on the pharmacological features of febuxostat analogues
Source: Royal Society of Chemistry journal article supplement (doi:10.1039/d2nj00115b), 2022-01-01
Supplement: d2nj00115b1.pdf [file d2nj00115b1.pdf]

## *Supporting Information*

# **A multiscale screening strategy for identification of novel xanthine oxidase inhibitors based on the pharmacological features of febuxostat analogues**

Na Zhai <sup>a</sup>, Yanming Chen <sup>a</sup>, Chenchen Wang <sup>a</sup>, Fengshou Wu <sup>a</sup>, Xiaogang Luo <sup>a,b</sup>,  
Xiulian Ju <sup>a</sup>, Hui Liu <sup>c,\*</sup>, Genyan Liu <sup>a,\*</sup>

<sup>a</sup> *Key Laboratory for Green Chemical Process of Ministry of Education, Hubei Key Laboratory of Novel Reactor and Green Chemical Technology, School of Chemical Engineering and Pharmacy, Wuhan Institute of Technology, Wuhan 430205, P. R. China*

<sup>b</sup> *School of Materials Science and Engineering, Zhengzhou University, No.100 Science Avenue, Zhengzhou City, 450001, Henan Province, P. R. China*

<sup>c</sup> *Department of Hematology, Renmin Hospital of Wuhan University, Wuhan 430060, Hubei, P. R. China*

\*Corresponding authors.

*E-mail:* liugenyan@wit.edu.cn (Genyan Liu); 13720231933@163.com (Hui Liu)

**Table S1** Predicted ADMET properties of virtual-screened hits and febuxostat by pkCSM and SwissADME.

| <b>Properties</b>                                                  | <b>N1</b> | <b>N2</b> | <b>N3</b> | <b>N4</b> | <b>N5</b> | <b>N6</b> | <b>Febuxostat</b> |
|--------------------------------------------------------------------|-----------|-----------|-----------|-----------|-----------|-----------|-------------------|
| <b>Absorption</b>                                                  |           |           |           |           |           |           |                   |
| Water solubility (log mol/L)                                       | -2.829    | -4.754    | -3.744    | -4.463    | -3.469    | -4.335    | -3.019            |
| Caco2 permeability (log P <sub>app</sub> in 10 <sup>-6</sup> cm/s) | 0.247     | 1.4       | 0.656     | 1.261     | 0.607     | 0.244     | 1.031             |
| Intestinal absorption (human) (% Absorbed)                         | 63.307    | 91.589    | 87.33     | 91.359    | 64.954    | 90.963    | 93.929            |
| Skin Permeability (log K <sub>p</sub> )                            | -2.735    | -2.761    | -2.817    | -2.745    | -2.734    | -2.735    | -2.734            |
| P-glycoprotein substrate                                           | Yes       | No        | Yes       | No        | Yes       | Yes       | Yes               |
| P-glycoprotein I inhibitor                                         | No        | Yes       | Yes       | Yes       | No        | Yes       | No                |
| P-glycoprotein II inhibitor                                        | No        | Yes       | No        | Yes       | No        | Yes       | No                |
| <b>Distribution</b>                                                |           |           |           |           |           |           |                   |
| VD <sub>ss</sub> (human) (log L/kg)                                | -1.045    | -0.275    | -0.54     | -0.565    | -0.838    | -0.55     | -1.209            |
| Fraction unbound (human)                                           | 0.326     | 0.083     | 0.007     | 0.1       | 0.105     | 0         | 0.285             |
| BBB permeability (log BB)                                          | -0.713    | -0.661    | -1.423    | -1.384    | -1.105    | -1.069    | -0.629            |
| CNS permeability (log PS)                                          | -3.15     | -2.503    | -3.762    | -3.384    | -3.573    | -2.414    | -2.146            |
| <b>Metabolism</b>                                                  |           |           |           |           |           |           |                   |
| CYP2D6 substrate                                                   | No                |
| CYP3A4 substrate                                                   | No        | Yes       | Yes       | Yes       | No        | Yes       | No                |
| CYP1A2 inhibitor                                                   | No        | Yes       | No        | No        | No        | No        | No                |
| CYP2C19 inhibitor                                                  | No        | Yes       | No        | Yes       | No        | Yes       | No                |
| CYP2C9 inhibitor                                                   | No        | Yes       | Yes       | Yes       | No        | Yes       | No                |
| CYP2D6 inhibitor                                                   | No                |
| CYP3A4 inhibitor                                                   | No        | Yes       | Yes       | Yes       | No        | Yes       | No                |
| <b>Excretion</b>                                                   |           |           |           |           |           |           |                   |
| Total Clearance (log ml/min/kg)                                    | 0.568     | 0.244     | 0.626     | 0.537     | 0.514     | 0.71      | 0.313             |
| Renal OCT2 substrate                                               | No                |

---

| <b>Toxicity</b>                             |       |        |        |        |       |        |        |
|---------------------------------------------|-------|--------|--------|--------|-------|--------|--------|
| AMES toxicity                               | No    | No     | No     | No     | No    | No     | No     |
| Max. tolerated dose (human)                 | 1.414 | 0.722  | -0.229 | 0.637  | 0.418 | 0.246  | 0.598  |
| hERG I inhibitor                            | No    | No     | No     | No     | No    | No     | No     |
| hERG II inhibitor                           | No    | Yes    | No     | No     | No    | Yes    | No     |
| Oral Rat Acute Toxicity (LD <sub>50</sub> ) | 2.201 | 2.195  | 2.627  | 2.734  | 2.812 | 2.207  | 2.649  |
| Oral Rat Chronic Toxicity (LOAEL)           | 1.894 | 1.373  | 1.177  | 1.179  | 1.98  | 1.823  | 1.323  |
| Hepatotoxicity                              | Yes   | Yes    | Yes    | Yes    | Yes   | Yes    | No     |
| Skin Sensitisation                          | No    | No     | No     | No     | No    | No     | No     |
| <i>T. Pyriformis</i> toxicity (log ug/L)    | 0.285 | 0.408  | 0.309  | 0.309  | 0.285 | 0.287  | 0.327  |
| Minnow toxicity (log mM)                    | 2.174 | -2.005 | 1.342  | -1.205 | 1.53  | -1.737 | -0.491 |
| <b>Synthetic accessibility</b>              | 2.61  | 2.96   | 3.85   | 3.73   | 3.49  | 3.82   | 3.12   |

---

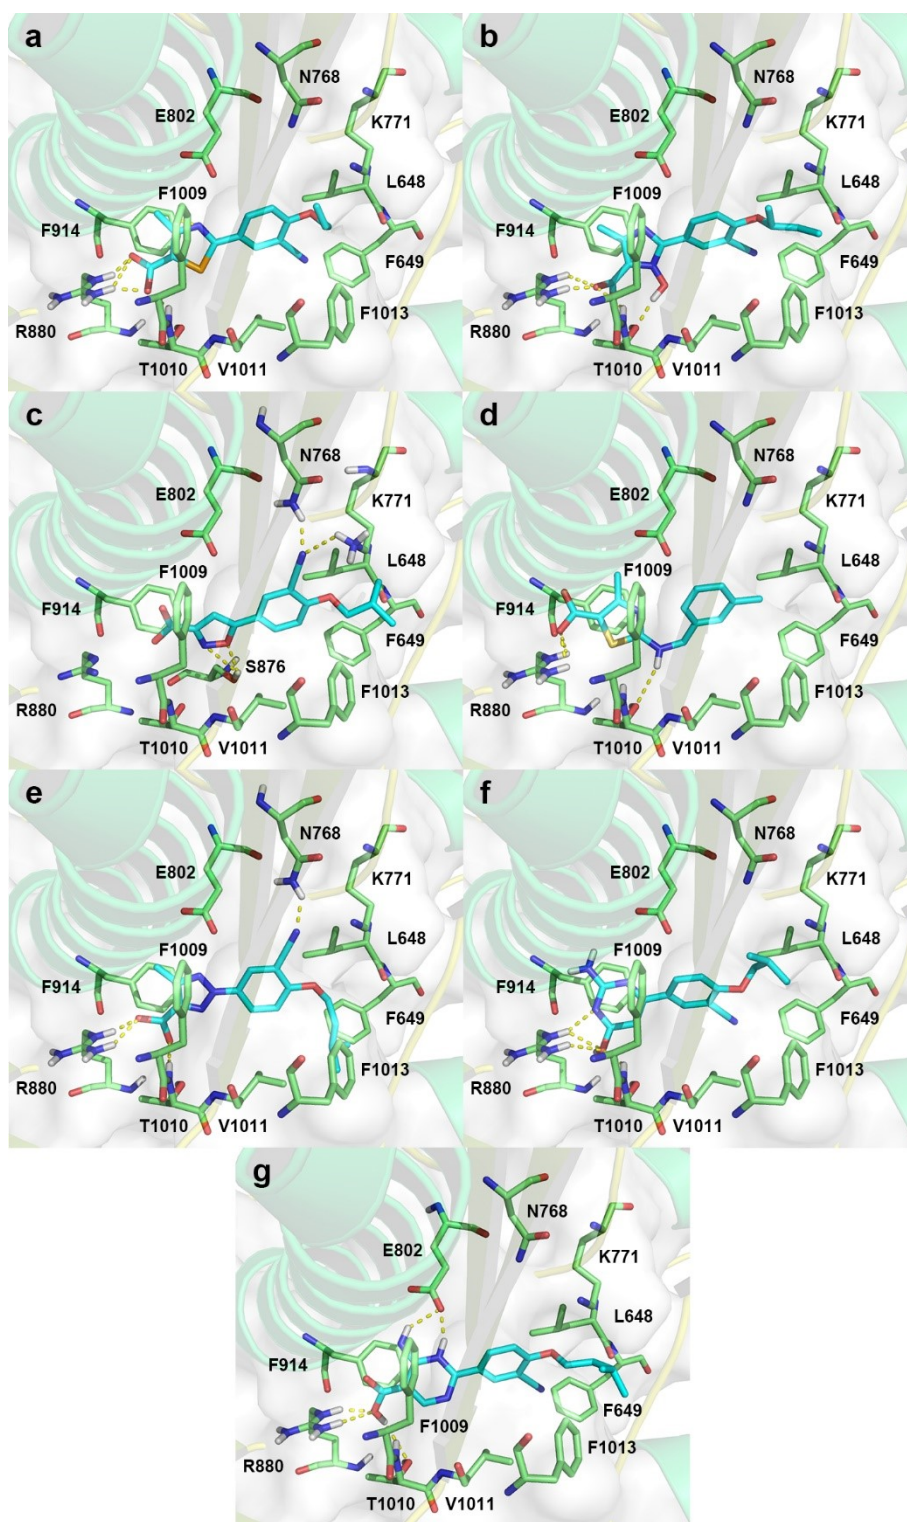

**Fig. S1** Docking results of febxostat analogues 4-10 (a-g) with 1N5X. The protein, binding pocket, ligands, important residues, and H-bonds were shown as cartoon, surface, blue sticks, green sticks, and yellow dashes, respectively.

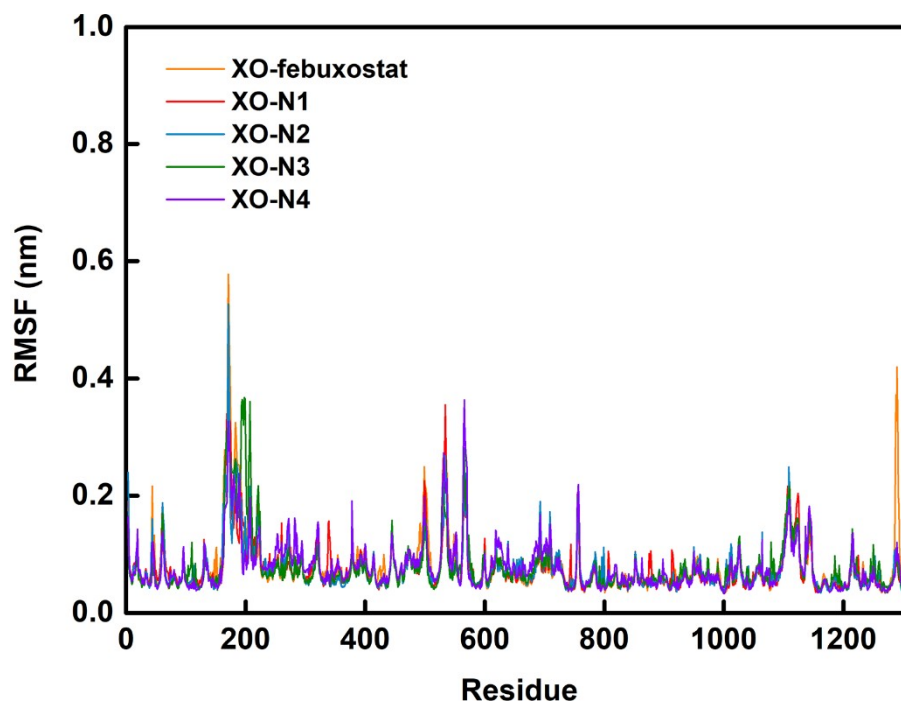

**Fig. S2** RMSF plots of complexes XO-febuxostat (orange), XO-N1 (red), XO-N2 (blue), XO-N3 (olive), and XO-N4 (violet) during MD simulations.

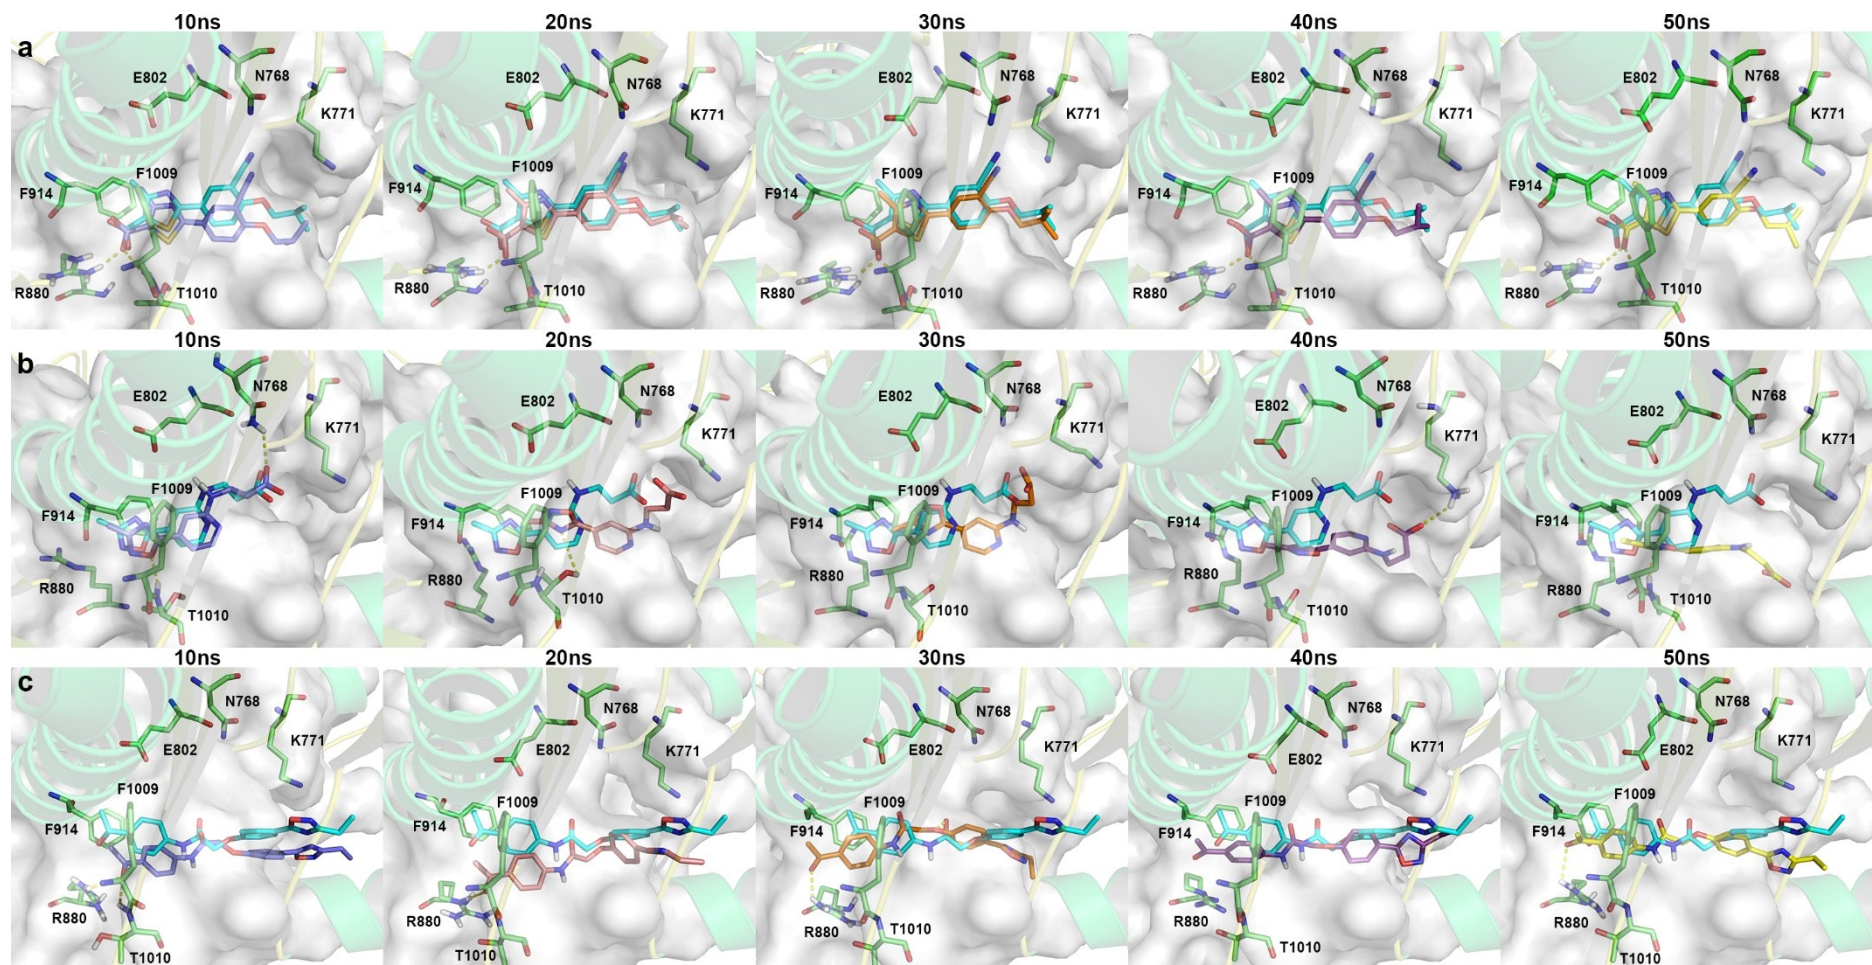

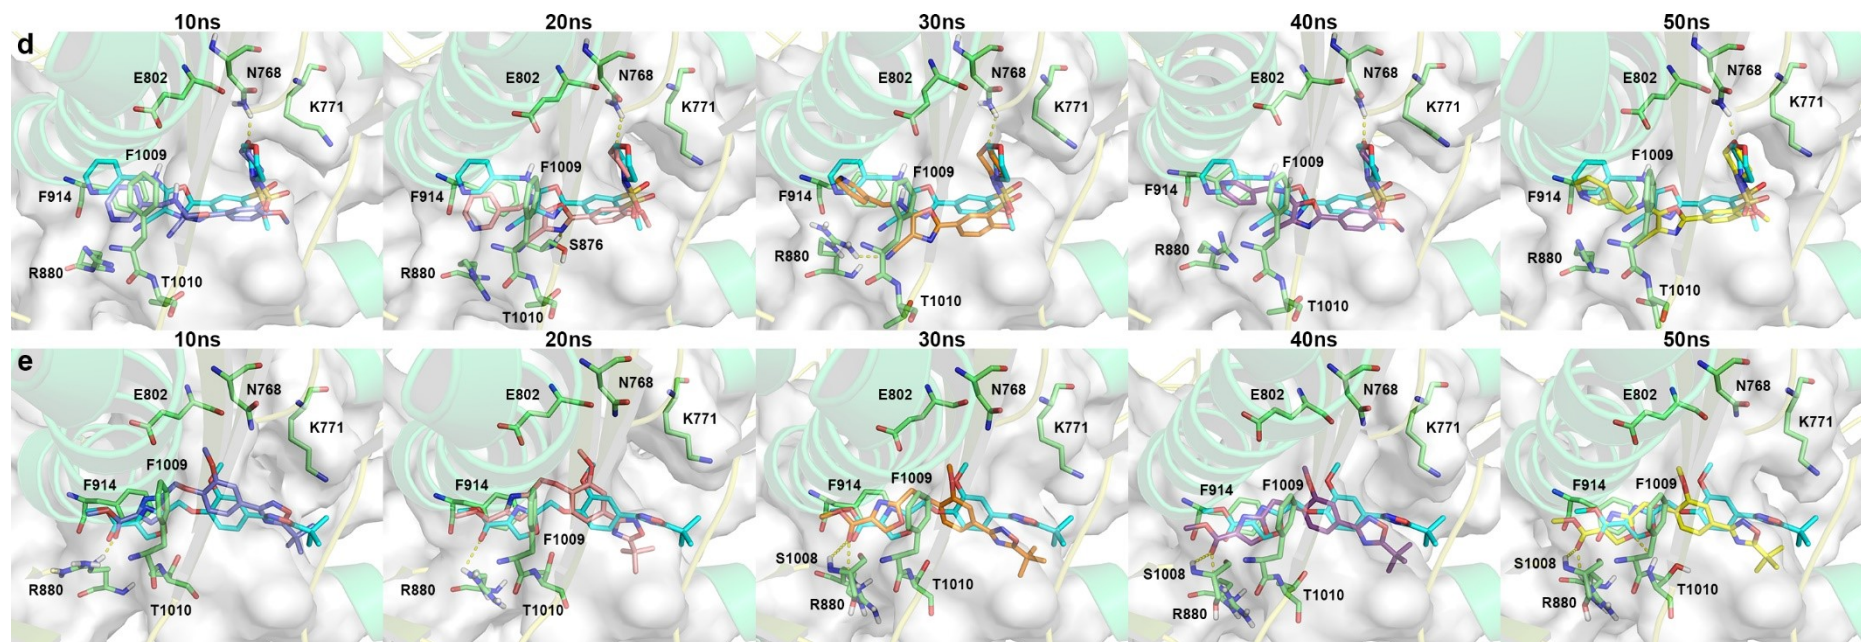

**Fig. S3** 3D plots of febxostat (a), N1 (b), N2 (c), N3 (d) and N4 (e) with XO at 10, 20, 30, 40, and 50 ns during MD simulations. The protein, binding pocket, H-bonds, and important residues were shown as cartoon, surface, yellow dashes, and green sticks, and the different conformations at 0, 10, 20, 30, 40 and 50 ns were shown as blue, violet, pink, orange, purple, and yellow sticks, respectively.
